# Supplementary material for: Ubiquitin Specific Peptidase 15 (USP15) suppresses glioblastoma cell growth via stabilization of HECTD1 E3 ligase attenuating WNT pathway activity
Source: PubMed Central journal article supplement (PMC5746398; doi:10.18632/oncotarget.22798), 2017-11-30
Supplement: oncotarget-08-110490-s001.pdf [file oncotarget-08-110490-s001.pdf]

## Ubiquitin Specific Peptidase 15 (USP15) suppresses glioblastoma cell growth via stabilization of HECTD1 E3 ligase attenuating WNT pathway activity

### SUPPLEMENTARY MATERIALS

#### Cell cycle analysis

1.5\*10<sup>6</sup> cells were transfected with 50 nM of siRNAs and left to recover. After 24 hours of culture with 5% FCS in DMEM media, cells were subjected to serum starvation (0.1% FCS) for 48 hours to synchronize cells in G1 phase. After serum starvation cells were stimulated by adding 5% FCS to the media for 24 hours to enter the cell cycle. Cells were washed twice with 1x PBS and harvested by trypsinization (Gemco, UK). Cells were fixed with 70%

ethanol and left at 4°C overnight. The next day, they were washed with 1xPBS and then subjected to RNAase A treatment and stained with Propidium Iodide (PI) (Sigma) for 30 min at room temperature and analyzed by fluorescence-activated cell sorting (FACS). Cell size was evaluated by forward scatter (FS) and side scatter (SS) analysis, and doublets were excluded using pulse area/pulse width. Cells were analysed with a BD LSR II system. 5 × 10<sup>4</sup> events were counted for all samples. FACS cell cycle data were analyzed by ModFit LT™ software.

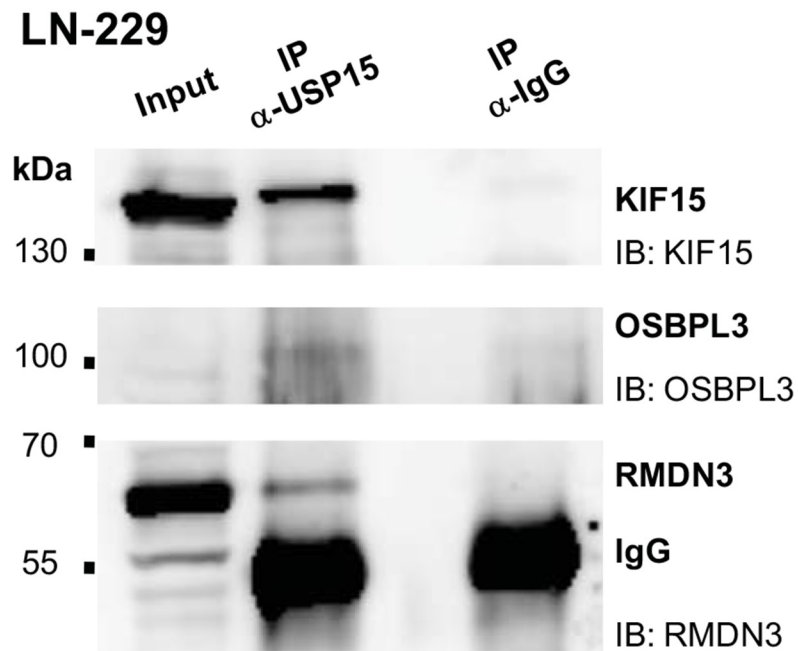

**Supplementary Figure 1: USP15 interactions in the GBM cell line LN-229.** Immunoprecipitation using an antibody against the endogenous USP15 in LN-229 protein extract, analyzed with Western blot using antibodies against KIF15 (dilution 1:3000, NBP1-49926, Novus Biologicals), OSBPL3 (dilution 1:2000, NBP1-55151, Novus Biologicals), and RMDN3 (FAM82A2, 1:5000, NBP1-47294, Novus Biologicals).

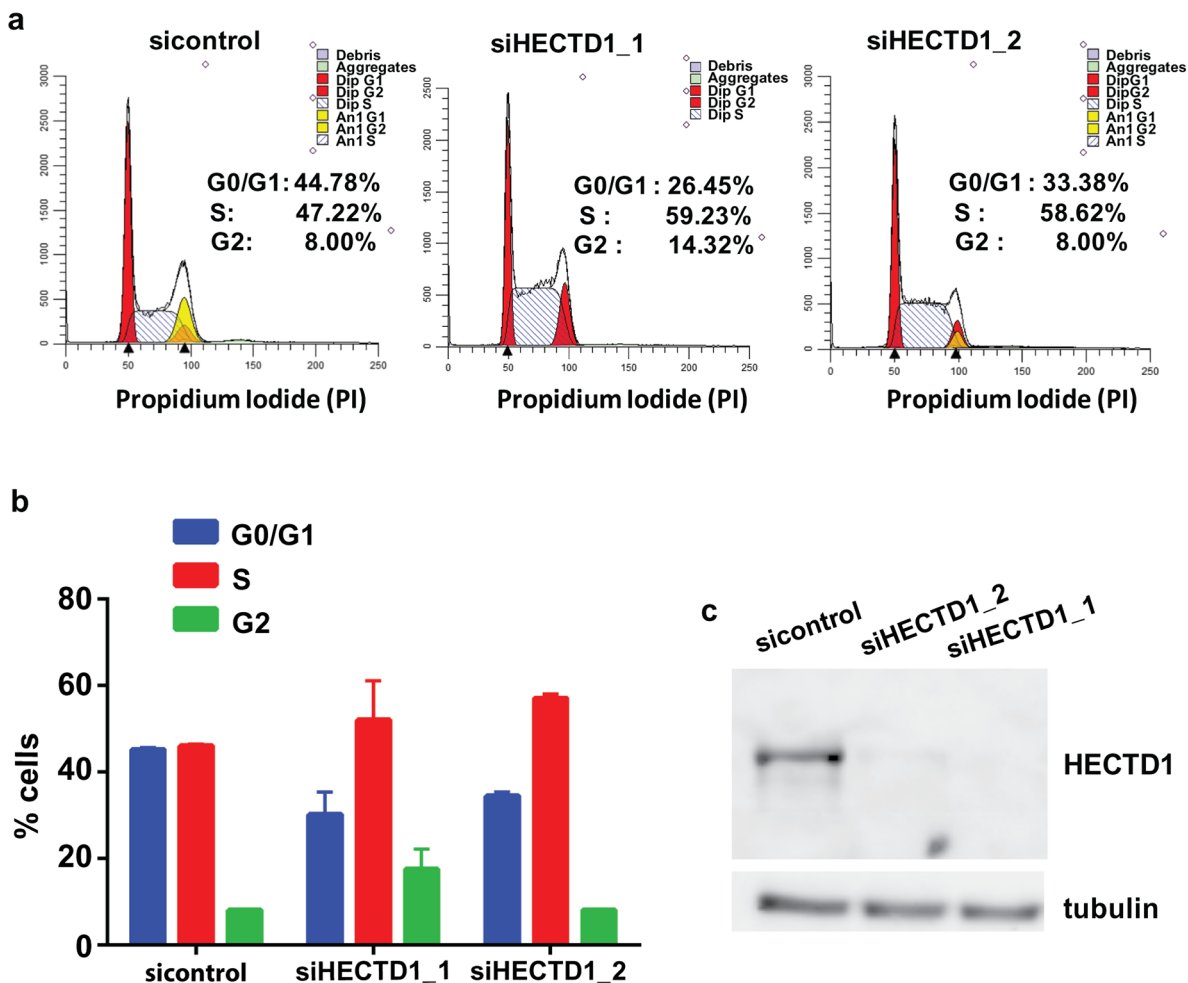

**Supplementary Figure 2: HECTD1 knockdown in LN-229 cells.** LN-229 cells were transfected with 50 nM of siHECTD1\_1, siHECTD1\_2, or sicontrol (for sequences see Supplementary Table 2) and were left to recover for 24 hours. After synchronization of the cells in G0/G1 by serum starvation, cells were stimulated with 5% serum for 24 hours. Cells were harvested, stained with propidium iodide (PI) and analyzed by FACS. Depletion of endogenous HECTD1 lead to a faster transition of LN-229 cells from G0/G1 to S phase promoting the cell cycle (a). The quantification the experiments is visualized in a histogram represented as mean +/- SD (b). HECTD1 knockdown was confirmed by Western blot 96 hours after transfection (c). (See Supplementary Method for details)

Supplementary Table 1: USP15 Interactors of the \*STRIPAK complex in LN-229

| Identifier       | UniProt description                      | Number of Spectra  |             |                    |             |
|------------------|------------------------------------------|--------------------|-------------|--------------------|-------------|
|                  |                                          | 1 <sup>st</sup> IP |             | 2 <sup>nd</sup> IP |             |
|                  |                                          | $\alpha$ -USP15    | IgG control | $\alpha$ -USP15    | IgG control |
| <b>USP15</b>     | Ubiquitin carboxyl-terminal hydrolase 15 | 232                | 2           | 392                | 0           |
| <b>HECTD1</b>    | E3 ubiquitin-protein ligase HECTD1       | 25                 | 0           | 68                 | 0           |
| <b>STRN4</b>     | Striatin-4                               | 2                  | 1           | 4                  | 0           |
| <b>STRN3</b>     | Striatin-3                               | 9                  | 1           | 15                 | 0           |
| <b>FAM40A</b>    | Protein FAM40A                           | -                  | -           | 4                  | 0           |
| <b>STRN</b>      | Striatin                                 | -                  | -           | 4                  | 0           |
| <b>CTTNBP2</b>   | Cortactin-binding protein 2              | -                  | -           | 5                  | 0           |
| <b>CTTNBP2NL</b> | CTTNBP2 N-terminal-like protein          | -                  | -           | 5                  | 0           |

\* striatin-interacting phosphatase and kinase.

Supplementary Table 2: Sequences of siRNAs and primers

| siRNAs                          |                                                  |                                          |
|---------------------------------|--------------------------------------------------|------------------------------------------|
| Gene/Name                       | Sense strand sequence (core seq.) 5'-3'          |                                          |
| USP15_1                         | GAUGAUACCAGGCAUAUAA                              |                                          |
| USP15_2                         | GGUAUUGTCCGAAUUGTAA                              |                                          |
| USP15_3                         | Mission esiRNA, EHU0<br>90661-20 UG, Sigma       |                                          |
| HECTD1_1                        | AGAUAAAGGUGGUGAUUA                               |                                          |
| HECTD1_2                        | GAGAACACUUGGAGAGAUU                              |                                          |
| Neg. control                    | AGGUAGUGUAAUCGCCUUGtt                            |                                          |
| PrImers                         |                                                  |                                          |
| Gene/Name                       | Forward 5'-3'                                    | Reverse 5'-3'                            |
| <i>USP15</i> residues 1–1627    | AAAAGTCGACAT<br>GGCGGAAGGCGGAGCG                 | GCGCGGTAACAT<br>CATCTTATCTGCAGGTATTCC    |
| <i>USP15</i> residues 1628-3000 | GCGCGCAATACCTGC<br>AGATAAGATGATAGTTACTGA         | GCGCTTCTAGATTA<br>GTTAGTGTGCATACAGTTTTTC |
| <i>USP15C/S</i>                 | ATAGAGGCCTCTGTGGCCTAAGTAAC<br>TTGGGAAATACGAGTTTC | GCTGAGTTCATG<br>AAACTGTATTTCCCAAGTTAC    |
| USP15                           | CAACCACTATGGAGGGATGG                             | TTGGTCTTCAG<br>ATGCAGTGG                 |
| USP15_2                         | ACTGAGGATACTTG<br>CAAAGGTCAACTC                  | CATCAAATCTTATATG<br>CCTGGTATCATC         |
| HECTD1                          | CATCAAATCTTATA<br>TGCTTGGTATCATC                 | GCGGCTTCTTGG<br>GAACTCTA                 |
| AXIN2                           | GAGACCCAGCAGCACCTTTC                             | CAATGGCAAAC<br>AGAATGTACAGATT            |
